# Supplementary material
Source: PubMed Central journal article supplement (PMC3302483)

HERV-Fc1 assay DNA level

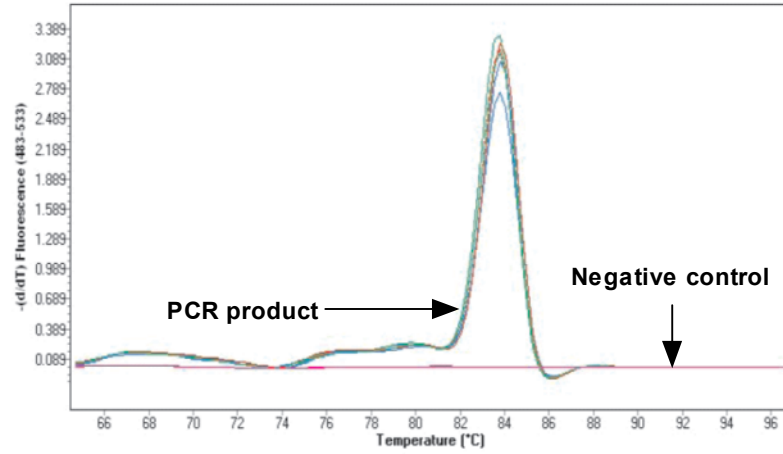

HERV-Fc1 assay RNA level

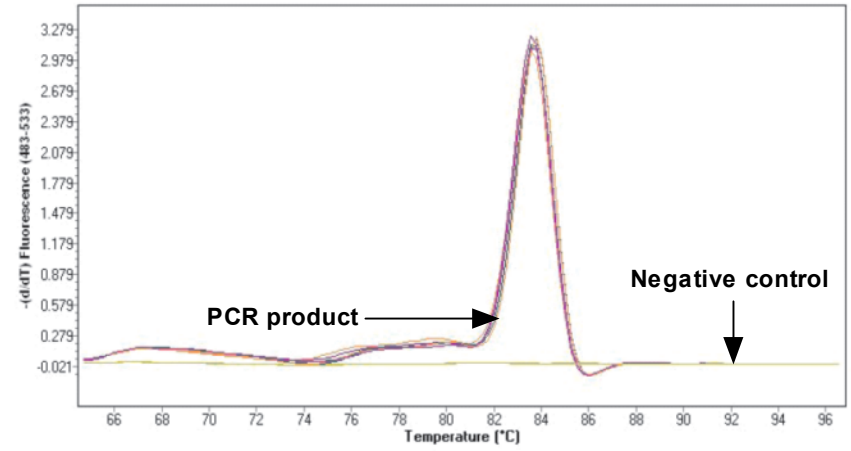

Correlation coefficient :0,993

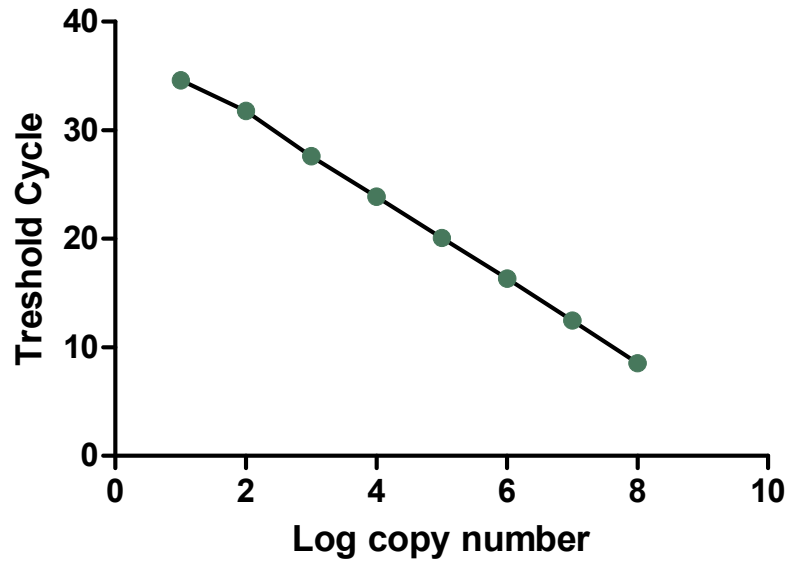

Correlation coefficient :0,993

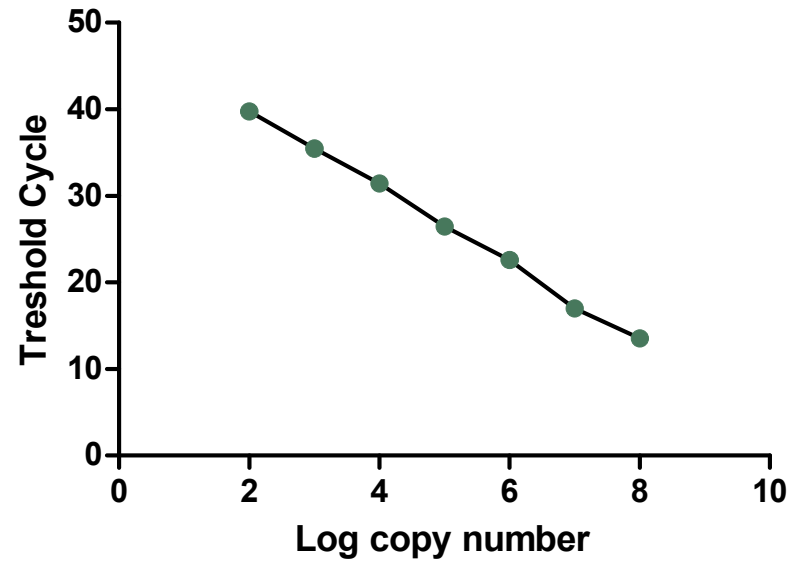

Supplement: supp_86.7.3713_FigS1A-S1B.pdf [file supp_86.7.3713_FigS1A-S1B.pdf]
