# Supplementary material
Source: PubMed Central journal article supplement (PMC3302483)
Supplement: supp_86.7.3713_SuppFigLegends.pdf [file supp_86.7.3713_SuppFigLegends.pdf]

## **Figure legends**

### **Supplementary Figure 1a**

#### **Melting curve plots obtained from HERV-Fc1 *gag* DNA sequences amplified by absolute Q-PCR and the calibration curve used for viral HERV-Fc1 *gag* DNA copy number quantification**

The melting curve analysis showed one peak corresponding to the specific PCR product (83<sup>0</sup>C). The absolute quantification analyses were done with fluorescence signals captured at 72<sup>0</sup>C. No signal was observed for the negative control (dH<sub>2</sub>O). Regression curve for HERV-Fc1 *gag* DNA quantification using SYBR Green Q-PCR. DNA standard dilutions range (2.0 x 10<sup>1</sup> to 2.0 x 10<sup>10</sup>).

### **Supplementary Figure 1b**

#### **Melting curve plots obtained from HERV-Fc1 *gag* RNA sequences amplified by absolute Q-PCR and calibration curve used for extracellular HERV-Fc1 *gag* RNA copy number quantification**

The melting curve analysis showed one peak corresponding to the specific PCR product (83<sup>0</sup>C). The absolute quantification analyses were done with fluorescence signals captured at 72<sup>0</sup>C. No signal was observed for the negative control (dH<sub>2</sub>O). Regression curve for HERV-Fc1 *gag* RNA quantification using SYBR Green Q-PCR. RNA standard dilutions range (5.52 x 10<sup>2</sup> to 5.52 x 10<sup>8</sup>).

### **Supplementary Figure 2**

#### **Specificity of the HERV-H/F Gag Flow Cytometry assay with anti HERV-H/F antibodies**

Histogram showing no overlap in the emission spectra of the control PBMCs labeled with FITC antibody (control), pre-immune serum (control) or anti-HERV-H/F Gag antibodies.

### **Supplementary Figure 3**

#### **Flow Cytometry Compensation**

Compensation analyses excluding inherent overlap of the emission spectra from antibody fluorescent labels. Optimum compensation % settings were achieved by adjusting high voltage settings for PMT detectors using the negative controls, followed by individual stained samples. PMT- photomultiplier tube.

### **Supplementary Figure 4**

#### **HERV-H/F Gag expression in healthy controls (immune-staining).**

Cytospins were prepared on samples analysed by flow cytometry. Total PBMCs from three control individuals were stained with anti-HERV-H/F Gag antibodies or with the appropriate control, pre-immune serum. Left panel; samples stained with anti-HERV-H/F Gag antibodies, right panel; sample stained with pre-immune serum.
