# Supplementary material
Source: PubMed Central journal article supplement (PMC3302483)

Anti-HERV-H/F antibodies

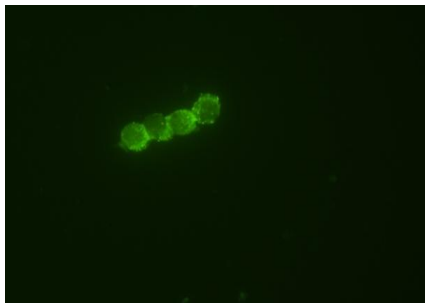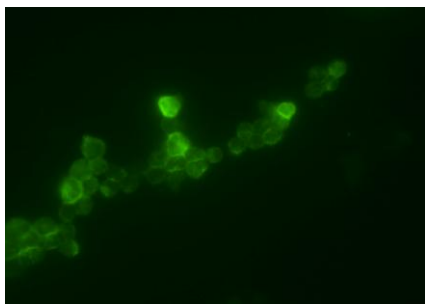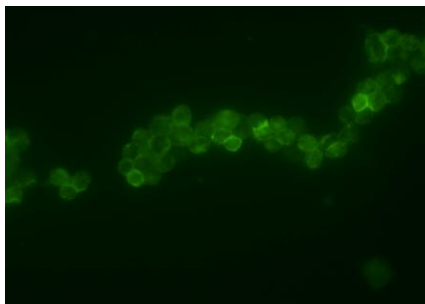

Preimmune serum

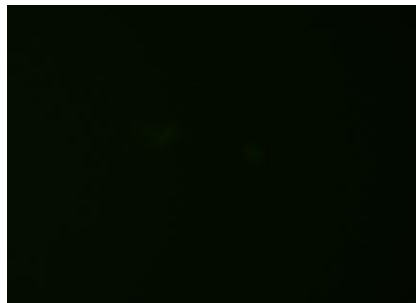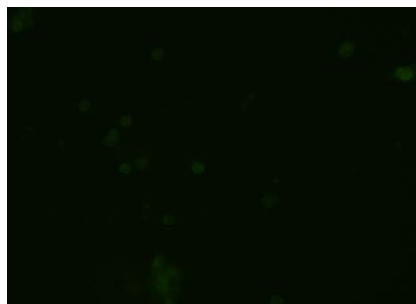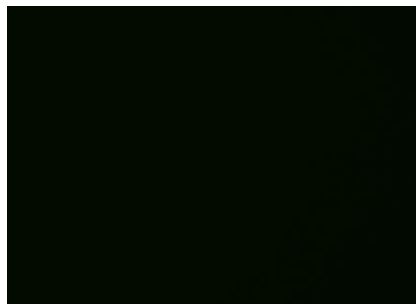

Sample #1

Sample #2

Sample #3

Supplement: supp_86.7.3713_FigS4.pdf [file supp_86.7.3713_FigS4.pdf]
